# Supplementary material for: Identification of diagnostic markers for major depressive disorder by cross-validation of data from whole blood samples
Source: PeerJ. 2019 Jun 21;7:e7171. doi: 10.7717/peerj.7171 (PMC6590482; doi:10.7717/peerj.7171)
Supplement: Supplemental Information 2 — The hub genes with the top 20 scores were analyzed using the NetworkAnalyzer plugin. [file peerj-07-7171-s002.xlsx]

## Sheet: Dataset(1)
Name of dataset: 1
No. of identified items: 20 of 20
No. of unidentified items: 0
ID type: GeneSymbol
Number of mapped gene: 20
Is dataset quantitative :NO
Mapped items:
Dataset item (Gene symbol )		Entrez ID	Gene symbol	Description	Alternate names	Chromosome	Map location
MRPS11		64963	MRPS11	mitochondrial ribosomal protein S11	HCC-2	15	15q25
MRPS2		51116	MRPS2	mitochondrial ribosomal protein S2	CGI-91|MRP-S2|S2mt	9	9q34
MRPL2		51069	MRPL2	mitochondrial ribosomal protein L2	CGI-22|MRP-L14|RPML14	6	6p21.3
MRPL15		29088	MRPL15	mitochondrial ribosomal protein L15	HSPC145|L15mt|MRP-L15|MRP-L7|RPML7	8	8q11.2-q13
MRPL16		54948	MRPL16	mitochondrial ribosomal protein L16	L16mt|MRP-L16|PNAS-111	11	11q12.1
MRPS7		51081	MRPS7	mitochondrial ribosomal protein S7	MRP-S|MRP-S7|RP-S7|RPMS7|S7mt|bMRP27a	17	17q25
RPS18		6222	RPS18	ribosomal protein S18	D6S218E|HKE3|KE-3|KE3|S18	6	6p21.3
RPS3		6188	RPS3	ribosomal protein S3	S3	11	11q13.3-q13.5
RPL11		6135	RPL11	ribosomal protein L11	DBA7|GIG34|L11	1	1p36.1-p35
RPL26L1		51121	RPL26L1	ribosomal protein L26-like 1	RPL26P1	5	5q35.1
RPL6		6128	RPL6	ribosomal protein L6	L6|SHUJUN-2|TAXREB107|TXREB1	12	12q24.1
RPL19		6143	RPL19	ribosomal protein L19	L19	17	17q12
RPS19		6223	RPS19	ribosomal protein S19	DBA|DBA1|S19	19	19q13.2
NSA2		10412	NSA2	NSA2 ribosome biogenesis homolog	CDK105|HCL-G1|HCLG1|HUSSY-29|HUSSY29|TINP1	5	5q13.3
NHP2		55651	NHP2	NHP2 ribonucleoprotein	DKCB2|NHP2P|NOLA2	5	5q35.3
RPP38		10557	RPP38	ribonuclease P/MRP 38kDa subunit	-	10	10p13
RPL29		6159	RPL29	ribosomal protein L29	HIP|HUMRPL29|L29|RPL29P10|RPL29_3_370	3	3p21.3-p21.2
MRPL36		64979	MRPL36	mitochondrial ribosomal protein L36	BRIP1|L36mt|MRP-L36|PRPL36|RPMJ	5	5p15.3
MRPL27		51264	MRPL27	mitochondrial ribosomal protein L27	L27mt	17	17q21.3-q22
MRPL9		65005	MRPL9	mitochondrial ribosomal protein L9	L9mt	1	1q21

## Sheet: Cellular component
Analysis: Cellular component
Dataset name: 1
Number of genes in the dataset: 20
Number of genes in the dataset (which are available in Cellular component database) :20
Number of genes in background: 14553
Is analysis quantitative: No
						Corrected p-values
Cellular component	No. of genes in the dataset	No. of genes in the background dataset	Percentage of genes	Fold enrichment	P-value (Hypergeometric test)	Bonferroni method	BH method	Q-value (Storey-Tibshirani method)	genes mapped (from input data set)
Plasma membrane	1	3479	5	0.21114	0.995781	1	1	1	RPL29;
Nucleus	4	5847	20	0.498788	0.984703	1	1	1	RPS3; NSA2; NHP2; RPL29;
Ribonucleoprotein complex	1	65	5	11.2992	0.0856916	1	1	1	RPS3;
Nucleolus	10	1257	50	5.79163	1.84002e-06	0.00144258	0.000360644	0.00245128	RPS18; RPL11; RPL26L1; RPL6; RPL19; RPS19; NSA2; NHP2; RPP38; RPL29;
Mitochondrion	13	1259	65	7.51543	6.2363e-10	4.88926e-07	2.44463e-07	1.6616e-06	MRPS11; MRPS2; MRPL2; MRPL15; MRPL16; MRPS7; RPL11; RPL6; RPS19; RPL29; MRPL36; MRPL27; MRPL9;
Cytosolic small ribosomal subunit	3	36	15	60.7924	1.53965e-05	0.0120709	0.00221775	0.0150739	RPS18; RPS3; RPS19;
Cytosol	8	1178	40	4.94526	9.37023e-05	0.0734626	0.00918283	0.0624152	RPS18; RPS3; RPL11; RPL26L1; RPL6; RPL19; RPS19; RPL29;
Ribosome	7	144	35	35.4023	5.58342e-10	4.3774e-07	2.44463e-07	1.6616e-06	RPS18; RPS3; RPL11; RPL26L1; RPL6; RPL19; NSA2;
Cytoplasm	3	5684	15	0.385139	0.995434	1	1	1	MRPL2; RPS3; RPL29;
Exosomes	6	2043	30	2.13949	0.0511331	1	1	1	RPS18; RPS3; RPL11; RPL26L1; RPL6; RPS19;
Lysosome	1	1620	5	0.453429	0.905762	1	1	1	RPS3;
Nucleoplasm	1	449	5	1.63595	0.46591	1	1	1	RPL11;
Centrosome	7	656	35	7.77165	1.69726e-05	0.0133065	0.00221775	0.0150739	RPS18; RPS3; RPL11; RPL6; RPL19; RPS19; RPL29;
Ruffle membrane	1	11	5	66.7175	0.0150188	1	1	1	RPS3;
Mitochondrial ribosome	1	13	5	56.4612	0.0177264	1	1	1	MRPL9;
Cytosolic large ribosomal subunit	4	36	20	80.9892	1.48522e-07	0.000116441	3.88137e-05	0.000263815	RPL11; RPL6; RPL19; RPL29;
Small ribosomal subunit	1	13	5	56.4612	0.0177264	1	1	1	RPS18;
Nucleolar riboNuclease P complex	1	5	5	146.619	0.00685351	1	0.597017	1	RPP38;
Mitochondrial large ribosomal subunit	2	8	10	182.503	4.99939e-05	0.0391952	0.00559931	0.0380582	MRPL36; MRPL27;

## Sheet: Molecular function
Analysis: Molecular function
Dataset name: 1
Number of genes in the dataset: 20
Number of genes in the dataset (which are available in Molecular function database) :20
Number of genes in background: 18125
Is analysis quantitative: No
						Corrected p-values
Molecular function	No. of genes in the dataset	No. of genes in the background dataset	Percentage of genes	Fold enrichment	P-value (Hypergeometric test)	Bonferroni method	BH method	Q-value (Storey-Tibshirani method)	genes mapped (from input data set)
Molecular function unknown	2	5685	10	0.320255	0.994563	1	1	1	RPL26L1; NSA2;
Ribonuclease activity	1	48	5	19.0555	0.0516803	1	1	1	RPP38;
RNA binding	1	366	5	2.49954	0.335162	1	1	1	NHP2;
Structural constituent of ribosome	16	152	80	95.4004	1.25241e-30	2.80539e-28	2.80539e-28	1.91722e-27	MRPS11; MRPS2; MRPL2; MRPL15; MRPL16; MRPS7; RPS18; RPS3; RPL11; RPL6; RPL19; RPS19; RPL29; MRPL36; MRPL27; MRPL9;

## Sheet: Biological process
Analysis: Biological process
Dataset name: 1
Number of genes in the dataset: 20
Number of genes in the dataset (which are available in Biological process database) :20
Number of genes in background: 18124
Is analysis quantitative: No
						Corrected p-values
Biological process	No. of genes in the dataset	No. of genes in the background dataset	Percentage of genes	Fold enrichment	P-value (Hypergeometric test)	Bonferroni method	BH method	Q-value (Storey-Tibshirani method)	genes mapped (from input data set)
Biological_process unknown	1	4731	5	0.193364	0.997651	1	1	1	RPL26L1;
Protein metabolism	16	1323	80	10.9606	2.18446e-15	3.88834e-13	3.88834e-13	2.64951e-12	MRPS11; MRPS2; MRPL2; MRPL15; MRPL16; MRPS7; RPS18; RPS3; RPL11; RPL6; RPL19; RPS19; RPL29; MRPL36; MRPL27; MRPL9;
Regulation of nucleobase, nucleoside, nucleotide and nucleic acid metabolism	1	2828	5	0.32348	0.966455	1	1	1	NSA2;
RNA metabolism	1	26	5	35.1713	0.0283182	1	1	1	RPP38;
Ribosome biogenesis and assembly	1	4	5	228.131	0.0044071	0.784464	0.392232	1	NHP2;

## Sheet: Biological pathway
Analysis: Biological pathway
Dataset name: 1
Number of genes in the dataset: 20
Number of genes in the dataset (which are available in Biological pathway database) :9
Number of genes in background: 6290
Is analysis quantitative: No
						Corrected p-values
Biological pathway	No. of genes in the dataset	No. of genes in the background dataset	Percentage of genes	Fold enrichment	P-value (Hypergeometric test)	Bonferroni method	BH method	Q-value (Storey-Tibshirani method)	genes mapped (from input data set)
Developmental Biology	8	432	88.8889	12.9439	3.94147e-09	6.57438e-06	2.52861e-07	1.71018e-06	RPS18; RPS3; RPL11; RPL26L1; RPL6; RPL19; RPS19; RPL29;
Regulation of beta-cell development	8	108	88.8889	51.772	5.1627e-14	8.61139e-11	6.15099e-12	4.16013e-11	RPS18; RPS3; RPL11; RPL26L1; RPL6; RPL19; RPS19; RPL29;
Regulation of gene expression in beta cells	8	98	88.8889	57.0543	2.3112e-14	3.85508e-11	4.81886e-12	3.25916e-11	RPS18; RPS3; RPL11; RPL26L1; RPL6; RPL19; RPS19; RPL29;
Insulin Synthesis and Processing	8	132	88.8889	42.3596	2.69126e-13	4.48903e-10	2.4939e-11	1.68671e-10	RPS18; RPS3; RPL11; RPL26L1; RPL6; RPL19; RPS19; RPL29;
Extension of Telomeres	1	28	11.1111	25.173	0.0393822	1	1	1	NHP2;
Telomere Extension By Telomerase	1	6	11.1111	117.32	0.00855779	1	0.446075	1	NHP2;
Telomere Maintenance	1	49	11.1111	14.3868	0.0680077	1	1	1	NHP2;
Diabetes pathways	8	216	88.8889	25.8872	1.48822e-11	2.48235e-08	1.18207e-09	7.99476e-09	RPS18; RPS3; RPL11; RPL26L1; RPL6; RPL19; RPS19; RPL29;
Chromosome Maintenance	1	69	11.1111	10.2173	0.0945626	1	1	1	NHP2;
Gene Expression	8	378	88.8889	14.793	1.35259e-09	2.25612e-06	9.0245e-08	6.10358e-07	RPS18; RPS3; RPL11; RPL26L1; RPL6; RPL19; RPS19; RPL29;
Metabolism	8	823	88.8889	6.79444	6.6395e-07	0.00110747	4.10174e-05	0.000277415	RPS18; RPS3; RPL11; RPL26L1; RPL6; RPL19; RPS19; RPL29;
L13a-mediated translational silencing of Ceruloplasmin expression	8	102	88.8889	54.8171	3.21889e-14	5.3691e-11	4.84964e-12	3.27998e-11	RPS18; RPS3; RPL11; RPL26L1; RPL6; RPL19; RPS19; RPL29;
3' -UTR-mediated translational regulation	8	102	88.8889	54.8171	3.21889e-14	5.3691e-11	4.84964e-12	3.27998e-11	RPS18; RPS3; RPL11; RPL26L1; RPL6; RPL19; RPS19; RPL29;
Eukaryotic Translation Termination	8	82	88.8889	68.1855	5.24658e-15	8.75129e-12	2.86747e-12	1.93937e-11	RPS18; RPS3; RPL11; RPL26L1; RPL6; RPL19; RPS19; RPL29;
Eukaryotic Translation Elongation	8	85	88.8889	65.7793	7.0811e-15	1.18113e-11	2.86747e-12	1.93937e-11	RPS18; RPS3; RPL11; RPL26L1; RPL6; RPL19; RPS19; RPL29;
Peptide chain elongation	8	82	88.8889	68.1855	5.24658e-15	8.75129e-12	2.86747e-12	1.93937e-11	RPS18; RPS3; RPL11; RPL26L1; RPL6; RPL19; RPS19; RPL29;
Ribosomal scanning and start codon recognition	3	54	33.3333	38.9062	4.84526e-05	0.0808189	0.00269396	0.0182202	RPS18; RPS3; RPS19;
GTP hydrolysis and joining of the 60S ribosomal subunit	8	103	88.8889	54.285	3.48945e-14	5.8204e-11	4.84964e-12	3.27998e-11	RPS18; RPS3; RPL11; RPL26L1; RPL6; RPL19; RPS19; RPL29;
Translation initiation complex formation	3	54	33.3333	38.9062	4.84526e-05	0.0808189	0.00269396	0.0182202	RPS18; RPS3; RPS19;
Activation of the mRNA upon binding of the cap-binding complex and eIFs, and subsequent binding to 43S	3	55	33.3333	38.1989	5.12111e-05	0.0854201	0.00275549	0.0186363	RPS18; RPS3; RPS19;
Formation of the ternary complex, and subsequently, the 43S complex	3	47	33.3333	44.6995	3.18344e-05	0.0530998	0.00189642	0.0128262	RPS18; RPS3; RPS19;
Translation	8	117	88.8889	47.7899	9.98803e-14	1.666e-10	9.80002e-12	6.62809e-11	RPS18; RPS3; RPL11; RPL26L1; RPL6; RPL19; RPS19; RPL29;
Eukaryotic Translation Initiation	8	110	88.8889	50.8308	6.0069e-14	1.00195e-10	6.26219e-12	4.23534e-11	RPS18; RPS3; RPL11; RPL26L1; RPL6; RPL19; RPS19; RPL29;
Cap-dependent Translation Initiation	8	110	88.8889	50.8308	6.0069e-14	1.00195e-10	6.26219e-12	4.23534e-11	RPS18; RPS3; RPL11; RPL26L1; RPL6; RPL19; RPS19; RPL29;
Formation of a pool of free 40S subunits	8	92	88.8889	60.7749	1.36823e-14	2.28221e-11	3.80368e-12	2.57256e-11	RPS18; RPS3; RPL11; RPL26L1; RPL6; RPL19; RPS19; RPL29;
Metabolism of proteins	8	259	88.8889	21.5895	6.46032e-11	1.07758e-07	4.68514e-09	3.16872e-08	RPS18; RPS3; RPL11; RPL26L1; RPL6; RPL19; RPS19; RPL29;
Viral mRNA Translation	8	82	88.8889	68.1855	5.24658e-15	8.75129e-12	2.86747e-12	1.93937e-11	RPS18; RPS3; RPL11; RPL26L1; RPL6; RPL19; RPS19; RPL29;
Influenza Viral RNA Transcription and Replication	8	98	88.8889	57.0543	2.3112e-14	3.85508e-11	4.81886e-12	3.25916e-11	RPS18; RPS3; RPL11; RPL26L1; RPL6; RPL19; RPS19; RPL29;
Influenza Life Cycle	8	135	88.8889	41.4184	3.23575e-13	5.39723e-10	2.84064e-11	1.92123e-10	RPS18; RPS3; RPL11; RPL26L1; RPL6; RPL19; RPS19; RPL29;
Influenza Infection	8	140	88.8889	39.9393	4.35868e-13	7.27027e-10	3.63514e-11	2.45857e-10	RPS18; RPS3; RPL11; RPL26L1; RPL6; RPL19; RPS19; RPL29;
Nonsense-Mediated Decay	8	104	88.8889	53.7631	3.77969e-14	6.30453e-11	4.84964e-12	3.27998e-11	RPS18; RPS3; RPL11; RPL26L1; RPL6; RPL19; RPS19; RPL29;
Metabolism of mRNA	8	234	88.8889	23.896	2.8448e-11	4.74513e-08	2.15688e-09	1.45877e-08	RPS18; RPS3; RPL11; RPL26L1; RPL6; RPL19; RPS19; RPL29;
Metabolism of RNA	8	281	88.8889	19.8993	1.24695e-10	2.07991e-07	8.66628e-09	5.86131e-08	RPS18; RPS3; RPL11; RPL26L1; RPL6; RPL19; RPS19; RPL29;
Nonsense Mediated Decay Enhanced by the Exon Junction Complex	8	104	88.8889	53.7631	3.77969e-14	6.30453e-11	4.84964e-12	3.27998e-11	RPS18; RPS3; RPL11; RPL26L1; RPL6; RPL19; RPS19; RPL29;
Nonsense Mediated Decay Independent of the Exon Junction Complex	8	87	88.8889	64.2673	8.59552e-15	1.43373e-11	2.86747e-12	1.93937e-11	RPS18; RPS3; RPL11; RPL26L1; RPL6; RPL19; RPS19; RPL29;
Syndecan-1-mediated signaling events	1	1297	11.1111	0.543631	0.875045	1	1	1	RPL11;
Glypican pathway	1	1335	11.1111	0.528157	0.883355	1	1	1	RPL11;
GMCSF-mediated signaling events	1	1289	11.1111	0.547005	0.873231	1	1	1	RPL11;
Insulin Pathway	1	1285	11.1111	0.548708	0.872314	1	1	1	RPL11;
C-MYC pathway	1	149	11.1111	4.73187	0.194184	1	1	1	RPL11;
Nectin adhesion pathway	1	1292	11.1111	0.545735	0.873914	1	1	1	RPL11;
TRAIL signaling pathway	1	1325	11.1111	0.532144	0.881217	1	1	1	RPL11;
IGF1 pathway	1	1288	11.1111	0.54743	0.873002	1	1	1	RPL11;
Signaling events mediated by Hepatocyte Growth Factor Receptor (c-Met)	1	1290	11.1111	0.546581	0.873459	1	1	1	RPL11;
Glypican 1 network	1	1296	11.1111	0.544051	0.87482	1	1	1	RPL11;
Validated targets of C-MYC transcriptional activation	1	81	11.1111	8.70381	0.110171	1	1	1	RPL11;
PDGF receptor signaling network	1	1290	11.1111	0.546581	0.873459	1	1	1	RPL11;
Integrin family cell surface interactions	1	1375	11.1111	0.512793	0.891567	1	1	1	RPL11;
Internalization of ErbB1	1	1285	11.1111	0.548708	0.872314	1	1	1	RPL11;
Signaling events mediated by VEGFR1 and VEGFR2	1	1293	11.1111	0.545313	0.874141	1	1	1	RPL11;
Beta1 integrin cell surface interactions	1	1348	11.1111	0.523064	0.886083	1	1	1	RPL11;
Urokinase-type plasminogen activator (uPA) and uPAR-mediated signaling	1	1285	11.1111	0.548708	0.872314	1	1	1	RPL11;
IFN-gamma pathway	1	1293	11.1111	0.545313	0.874141	1	1	1	RPL11;
PAR1-mediated thrombin signaling events	1	1296	11.1111	0.544051	0.87482	1	1	1	RPL11;
PDGFR-beta signaling pathway	1	1285	11.1111	0.548708	0.872314	1	1	1	RPL11;
EGF receptor (ErbB1) signaling pathway	1	1285	11.1111	0.548708	0.872314	1	1	1	RPL11;
Thrombin/protease-activated receptor (PAR) pathway	1	1297	11.1111	0.543631	0.875045	1	1	1	RPL11;
Class I PI3K signaling events	1	1285	11.1111	0.548708	0.872314	1	1	1	RPL11;
Arf6 signaling events	1	1285	11.1111	0.548708	0.872314	1	1	1	RPL11;
Plasma membrane estrogen receptor signaling	1	1298	11.1111	0.543213	0.875271	1	1	1	RPL11;
IL3-mediated signaling events	1	1292	11.1111	0.545735	0.873914	1	1	1	RPL11;
mTOR signaling pathway	1	1285	11.1111	0.548708	0.872314	1	1	1	RPL11;
ErbB receptor signaling network	1	1308	11.1111	0.53906	0.877503	1	1	1	RPL11;
Signaling events mediated by focal adhesion kinase	1	1285	11.1111	0.548708	0.872314	1	1	1	RPL11;
VEGF and VEGFR signaling network	1	1301	11.1111	0.54196	0.875944	1	1	1	RPL11;
Alpha9 beta1 integrin signaling events	1	1302	11.1111	0.541544	0.876168	1	1	1	RPL11;
Arf6 downstream pathway	1	1285	11.1111	0.548708	0.872314	1	1	1	RPL11;
S1P1 pathway	1	1285	11.1111	0.548708	0.872314	1	1	1	RPL11;
ATM pathway	1	307	11.1111	2.29665	0.362783	1	1	1	RPL11;
p53 pathway	1	189	11.1111	3.73047	0.24024	1	1	1	RPL11;
ErbB1 downstream signaling	1	1285	11.1111	0.548708	0.872314	1	1	1	RPL11;
EGFR-dependent Endothelin signaling events	1	1286	11.1111	0.548281	0.872544	1	1	1	RPL11;
ATR signaling pathway	1	250	11.1111	2.82027	0.305977	1	1	1	RPL11;
Arf6 trafficking events	1	1285	11.1111	0.548708	0.872314	1	1	1	RPL11;
Endothelins	1	1304	11.1111	0.540713	0.876615	1	1	1	RPL11;
IL5-mediated signaling events	1	1289	11.1111	0.547005	0.873231	1	1	1	RPL11;
Sphingosine 1-phosphate (S1P) pathway	1	1308	11.1111	0.53906	0.877503	1	1	1	RPL11;
Proteoglycan syndecan-mediated signaling events	1	1342	11.1111	0.525403	0.884831	1	1	1	RPL11;
Class I PI3K signaling events mediated by Akt	1	1285	11.1111	0.548708	0.872314	1	1	1	RPL11;
LKB1 signaling events	1	1305	11.1111	0.540299	0.876837	1	1	1	RPL11;
TNF alpha/NF-kB	1	171	11.1111	4.12312	0.219813	1	1	1	RPL6;

## Sheet: Protein domain
Analysis: Protein domain
Dataset name: 1
Number of genes in the dataset: 20
Number of genes in the dataset (which are available in Protein domain database) :4
Number of genes in background: 14847
Is analysis quantitative: No
						Corrected p-values
Protein domain	No. of genes in the dataset	No. of genes in the background dataset	Percentage of genes	Fold enrichment	P-value (Hypergeometric test)	Bonferroni method	BH method	Q-value (Storey-Tibshirani method)	genes mapped (from input data set)
coiled coil region	1	2968	25	1.25994	0.590248	1	1	1	RPL19;
signal peptide	1	3668	25	1.0195	0.678634	1	1	1	MRPL2;
KH	1	40	25	93.4647	0.0107342	1	1	1	RPS3;
KOW	1	8	25	466.857	0.00215379	1	1	1	RPL26L1;

## Sheet: Site of expression
Analysis: Site of expression
Dataset name: 1
Number of genes in the dataset: 20
Number of genes in the dataset (which are available in Site of expression database) :20
Number of genes in background: 18297
Is analysis quantitative: No
						Corrected p-values
Site of expression	No. of genes in the dataset	No. of genes in the background dataset	Percentage of genes	Fold enrichment	P-value (Hypergeometric test)	Bonferroni method	BH method	Q-value (Storey-Tibshirani method)	genes mapped (from input data set)
T cells	9	1726	45	4.77325	3.7087e-05	0.0314498	0.00224641	0.013635	MRPS7; RPS18; RPS3; RPL11; RPL6; RPL19; RPS19; NHP2; RPL29;
Monocyte	11	2842	55	3.54238	5.328e-05	0.0451815	0.0030121	0.0182825	MRPL15; RPS18; RPS3; RPL11; RPL26L1; RPL6; RPL19; RPS19; NHP2; RPL29; MRPL27;
MDA468	3	760	15	3.62143	0.0480731	1	0.762472	1	RPS3; RPL6; RPS19;
Small intestine	7	8360	35	0.766733	0.882846	1	1	1	MRPL2; MRPS7; RPL11; NSA2; NHP2; MRPL27; MRPL9;
Breast cancer	5	7467	25	0.613513	0.956244	1	1	1	MRPL2; MRPS7; RPL11; MRPL27; MRPL9;
Thyroid cancer	5	7281	25	0.629186	0.947184	1	1	1	MRPL2; MRPS7; RPL11; MRPL27; MRPL9;
Colon	8	8429	40	0.868938	0.77788	1	1	1	MRPL2; MRPS7; RPS3; RPL11; NSA2; NHP2; MRPL27; MRPL9;
Parathyroid gland	4	5997	20	0.611424	0.933307	1	1	1	MRPS7; RPL11; MRPL27; MRPL9;
Cervix, uterine	5	6391	25	0.716805	0.880644	1	1	1	MRPL2; MRPS7; RPL11; MRPL27; MRPL9;
Spleen	7	7887	35	0.812716	0.830655	1	1	1	MRPL2; MRPS7; RPL11; RPS19; NSA2; NHP2; MRPL9;
HUVEC	10	13061	50	0.700794	0.988179	1	1	1	MRPS11; MRPL15; MRPL16; MRPS7; RPL26L1; RPL6; NHP2; RPP38; MRPL27; MRPL9;
Tonsils	5	7274	25	0.629792	0.946815	1	1	1	MRPL2; MRPS7; RPL11; MRPL27; MRPL9;
Jurkat A3	15	4200	75	3.26786	1.17975e-06	0.00100043	0.000142919	0.000867474	MRPS11; MRPS2; MRPL2; MRPL15; MRPL16; MRPS7; RPS18; RPS3; RPL6; RPL19; RPS19; NHP2; RPL29; MRPL27; MRPL9;
Rectum	5	7113	25	0.644047	0.937734	1	1	1	MRPL2; MRPS7; RPL11; MRPL27; MRPL9;
Liver	12	11680	60	0.940227	0.726639	1	1	1	MRPL2; MRPS7; RPS18; RPS3; RPL11; RPL6; RPL19; RPS19; NHP2; RPL29; MRPL27; MRPL9;
CD4	9	1901	45	4.33385	7.99624e-05	0.0678081	0.00423801	0.0257234	RPS18; RPS3; RPL11; RPL26L1; RPL6; RPL19; RPS19; NHP2; RPL29;
Skeletal muscles	10	9060	50	1.01027	0.571016	1	1	1	MRPL2; MRPS7; RPS18; RPS3; RPL11; RPL19; RPS19; NHP2; MRPL27; MRPL9;
H293	19	6792	95	2.55927	8.48088e-08	7.19179e-05	1.79795e-05	0.00010913	MRPS11; MRPS2; MRPL2; MRPL15; MRPL16; MRPS7; RPS18; RPS3; RPL11; RPL26L1; RPL6; RPL19; RPS19; NSA2; NHP2; RPP38; RPL29; MRPL27; MRPL9;
Prostate	7	7923	35	0.809023	0.835099	1	1	1	MRPL2; MRPS7; RPL11; NSA2; NHP2; MRPL27; MRPL9;
Jurkat	12	2869	60	3.82775	7.88746e-06	0.00668857	0.000557381	0.00338313	MRPS2; MRPL15; RPS18; RPS3; RPL11; RPL26L1; RPL6; RPL19; RPS19; NHP2; RPL29; MRPL36;
Bone marrow	11	7808	55	1.28938	0.186588	1	1	1	MRPS2; MRPL2; MRPS7; RPS18; RPS3; RPL11; RPL6; RPL19; RPS19; MRPL27; MRPL9;
Lateral ventricle	5	6620	25	0.69201	0.901943	1	1	1	MRPL2; MRPS7; RPL11; MRPL27; MRPL9;
Colorectal cancer	5	7513	25	0.609757	0.958275	1	1	1	MRPL2; MRPS7; RPL11; MRPL27; MRPL9;
Gall bladder	5	7295	25	0.627979	0.947915	1	1	1	MRPL2; MRPS7; RPL11; MRPL27; MRPL9;
Plasma	15	11971	75	1.14652	0.257964	1	1	1	MRPS11; MRPL15; MRPL16; MRPS7; RPS18; RPS3; RPL11; RPL26L1; RPL6; RPL19; RPS19; NSA2; RPP38; RPL29; MRPL27;
Malignant carcinoid	5	7081	25	0.646957	0.935788	1	1	1	MRPL2; MRPS7; RPL11; MRPL27; MRPL9;
Ascites cancer cell	14	3509	70	3.65079	1.06603e-06	0.00090399	0.000142919	0.000867474	MRPS11; MRPL2; MRPL15; MRPL16; MRPS7; RPS18; RPS3; RPL11; RPL6; RPL19; RPS19; NHP2; MRPL27; MRPL9;
Endometrial cancer	5	7460	25	0.614089	0.955928	1	1	1	MRPL2; MRPS7; RPL11; MRPL27; MRPL9;
Lung cancer	5	7435	25	0.616154	0.954784	1	1	1	MRPL2; MRPS7; RPL11; MRPL27; MRPL9;
HCT116	12	2651	60	4.14252	3.37521e-06	0.00286218	0.000286218	0.00173726	MRPS7; RPS18; RPS3; RPL11; RPL26L1; RPL6; RPL19; RPS19; NSA2; NHP2; RPL29; MRPL9;
PC3	4	1294	20	2.83361	0.0485536	1	0.762472	1	RPS18; RPS3; RPL26L1; RPS19;
Epididymis	5	7090	25	0.646136	0.93634	1	1	1	MRPL2; MRPS7; RPL11; MRPL27; MRPL9;
Cerebellum	5	7633	25	0.600171	0.963207	1	1	1	MRPL2; MRPS7; RPL11; MRPL27; MRPL9;
Nasopharynx	5	6904	25	0.663543	0.92412	1	1	1	MRPL2; MRPS7; RPL11; MRPL27; MRPL9;
global_SCX_fractionated	12	2476	60	4.43531	1.60917e-06	0.00136458	0.000168462	0.00102251	MRPS11; RPS18; RPS3; RPL11; RPL26L1; RPL6; RPL19; RPS19; NHP2; RPP38; RPL29; MRPL27;
Hippocampus	5	7355	25	0.622856	0.950957	1	1	1	MRPL2; MRPS7; RPL11; MRPL27; MRPL9;
HeLa	12	5789	60	1.89702	0.00821993	1	0.188392	1	MRPS7; RPS18; RPS3; RPL11; RPL26L1; RPL6; RPL19; RPS19; NSA2; NHP2; RPP38; RPL29;
Malignant lymphoma	5	6586	25	0.695582	0.898982	1	1	1	MRPL2; MRPS7; RPL11; MRPL27; MRPL9;
Prostate cancer	5	7214	25	0.63503	0.943566	1	1	1	MRPL2; MRPS7; RPL11; MRPL27; MRPL9;
Skin	7	7292	35	0.87903	0.745843	1	1	1	MRPL2; MRPS7; RPS3; RPL11; RPL6; MRPL27; MRPL9;
Placenta	15	10894	75	1.25987	0.117093	1	1	1	MRPS11; MRPL2; MRPL15; MRPL16; MRPS7; RPS18; RPS3; RPL11; RPL26L1; RPL6; RPL19; RPS19; NHP2; MRPL27; MRPL9;
Lung	7	9992	35	0.641502	0.976763	1	1	1	MRPL2; MRPS7; RPL11; RPS19; NHP2; MRPL27; MRPL9;
Cerebral cortex	5	7099	25	0.645317	0.936889	1	1	1	MRPL2; MRPS7; RPL11; MRPL27; MRPL9;
Ovarian cancer	5	7644	25	0.599307	0.963634	1	1	1	MRPL2; MRPS7; RPL11; MRPL27; MRPL9;
Kidney	6	10256	30	0.535833	0.99512	1	1	1	MRPL2; MRPS7; RPS19; NHP2; MRPL27; MRPL9;
H1688	3	1007	15	2.73316	0.094361	1	1	1	RPS3; RPL11; RPS19;
Sy5y	16	2490	80	5.87927	3.73056e-11	3.16352e-08	1.58176e-08	9.6008e-08	MRPS11; MRPS2; MRPL2; MRPL15; MRPL16; MRPS7; RPS18; RPS3; RPL11; RPL6; RPL19; RPS19; NHP2; RPP38; RPL29; MRPL27;
Duodenum	6	7275	30	0.755395	0.870009	1	1	1	MRPL2; MRPS7; RPL11; RPL19; MRPL27; MRPL9;
Bronchus	5	6923	25	0.661722	0.925448	1	1	1	MRPL2; MRPS7; RPL11; MRPL27; MRPL9;
Brain	8	7290	40	1.0047	0.578495	1	1	1	RPS18; RPS3; RPL11; RPL26L1; RPL6; RPL19; RPS19; NHP2;
Stomach	5	8044	25	0.569506	0.976574	1	1	1	MRPL2; MRPS7; RPL11; MRPL27; MRPL9;
Pancreas	13	9936	65	1.19729	0.23224	1	1	1	MRPL2; MRPS7; RPS18; RPS3; RPL11; RPL26L1; RPL6; RPL19; RPS19; NSA2; NHP2; MRPL27; MRPL9;
Lymph nodes	6	6700	30	0.820223	0.799418	1	1	1	MRPL2; MRPS7; RPL11; RPS19; MRPL27; MRPL9;
H358	6	1489	30	3.69071	0.00411359	1	0.105707	0.641608	RPS18; RPS3; RPL6; RPL19; RPS19; RPL29;
Fallopian tubes	5	6677	25	0.686102	0.906756	1	1	1	MRPL2; MRPS7; RPL11; MRPL27; MRPL9;
Head & neck cancer	5	7062	25	0.648698	0.934609	1	1	1	MRPL2; MRPS7; RPL11; MRPL27; MRPL9;
Pancreatic cancer	11	8316	55	1.21061	0.262388	1	1	1	MRPL2; MRPS7; RPS18; RPS3; RPL11; RPL26L1; RPL6; RPL19; RPS19; MRPL27; MRPL9;
BT474	2	558	10	3.29372	0.123047	1	1	1	RPS18; RPL6;
Seminal vesicle	5	6620	25	0.69201	0.901943	1	1	1	MRPL2; MRPS7; RPL11; MRPL27; MRPL9;
Urinary bladder	5	7054	25	0.649434	0.934108	1	1	1	MRPL2; MRPS7; RPL11; MRPL27; MRPL9;
K-562	9	2513	45	3.27841	0.000686761	0.582373	0.0245623	0.149086	MRPS11; RPS18; RPS3; RPL11; RPL26L1; RPL6; RPL19; RPS19; NHP2;
Salivary glands	5	6607	25	0.693371	0.900819	1	1	1	MRPL2; MRPS7; RPL11; MRPL27; MRPL9;
Testis	8	10269	40	0.713242	0.953043	1	1	1	MRPL2; MRPS7; RPS3; RPL11; NSA2; NHP2; MRPL27; MRPL9;
Urothelial cancer	5	7521	25	0.609108	0.95862	1	1	1	MRPL2; MRPS7; RPL11; MRPL27; MRPL9;
R	8	1948	40	3.75988	0.000631235	0.535287	0.0243312	0.147683	RPS18; RPS3; RPL11; RPL26L1; RPL6; RPL19; RPS19; RPL29;
Soft tissue	5	6969	25	0.657355	0.928587	1	1	1	MRPL2; MRPS7; RPL11; MRPL27; MRPL9;
Testis cancer	5	7248	25	0.632051	0.945427	1	1	1	MRPL2; MRPS7; RPL11; MRPL27; MRPL9;
Neutrophil	7	2031	35	3.15601	0.00430698	1	0.107421	0.652014	RPS18; RPS3; RPL11; RPL26L1; RPL6; RPL19; NHP2;
CD8	11	3327	55	3.02598	0.000234211	0.198611	0.0110339	0.0669726	MRPL15; MRPS7; RPS18; RPS3; RPL11; RPL26L1; RPL6; RPL19; RPS19; NHP2; RPL29;
Stomach cancer	5	7399	25	0.619152	0.953093	1	1	1	MRPL2; MRPS7; RPL11; MRPL27; MRPL9;
Skin cancer	5	7029	25	0.651743	0.932521	1	1	1	MRPL2; MRPS7; RPL11; MRPL27; MRPL9;
Adrenal glands	5	7554	25	0.606447	0.960018	1	1	1	MRPL2; MRPS7; RPL11; MRPL27; MRPL9;
TOV112D	2	1276	10	1.44037	0.41132	1	1	1	RPS3; RPS19;
LNCaP	3	1455	15	1.89162	0.209448	1	1	1	RPS18; RPS3; RPS19;
Corpus, uterine	5	6997	25	0.654724	0.930445	1	1	1	MRPL2; MRPS7; RPL11; MRPL27; MRPL9;
Appendix	5	7004	25	0.65407	0.930903	1	1	1	MRPL2; MRPS7; RPL11; MRPL27; MRPL9;
Erythrocytes	4	1539	20	2.38252	0.0816956	1	1	1	RPS18; RPS3; RPL11; RPS19;
HTB75	3	1277	15	2.15529	0.159903	1	1	1	RPS3; RPL11; RPS19;
Smooth muscle cells	4	5124	20	0.715595	0.853683	1	1	1	MRPL2; MRPS7; MRPL27; MRPL9;
Urine	5	3267	25	1.40223	0.278834	1	1	1	MRPL16; RPS18; RPS3; RPL6; RPL19;
Heart	2	5507	10	0.333744	0.992566	1	1	1	RPS19; NHP2;
Thyroid gland	7	7306	35	0.877346	0.74808	1	1	1	MRPL2; MRPS7; RPL11; RPL6; NSA2; MRPL27; MRPL9;
H460	1	736	5	1.25479	0.560258	1	1	1	RPS3;
Heart muscle	4	6191	20	0.592265	0.94494	1	1	1	MRPL2; MRPS7; MRPL27; MRPL9;
B Cell	8	2254	40	3.24945	0.00167218	1	0.0545389	0.331035	RPS18; RPS3; RPL11; RPL26L1; RPL6; RPL19; RPS19; RPL29;
Malignant glioma	5	7169	25	0.639016	0.941025	1	1	1	MRPL2; MRPS7; RPL11; MRPL27; MRPL9;
Cervical cancer	5	7426	25	0.616901	0.954366	1	1	1	MRPL2; MRPS7; RPL11; MRPL27; MRPL9;
Malignant melanoma	5	7459	25	0.614171	0.955883	1	1	1	MRPL2; MRPS7; RPL11; MRPL27; MRPL9;
Embryonal carcinoma cells	11	1232	55	8.17158	1.17803e-08	9.98965e-06	3.32988e-06	2.02114e-05	MRPL2; MRPL15; MRPL16; MRPS7; RPS18; RPS3; RPL11; RPL6; RPL19; RPS19; RPL29;
ES2	14	3527	70	3.63216	1.13772e-06	0.000964789	0.000142919	0.000867474	MRPS11; MRPL2; MRPL15; MRPS7; RPS18; RPS3; RPL11; RPL6; RPL19; RPS19; NHP2; RPL29; MRPL27; MRPL9;
Ovary	14	8592	70	1.491	0.0322205	1	0.569228	1	MRPL2; MRPS7; RPS18; RPS3; RPL11; RPL26L1; RPL6; RPL19; RPS19; NSA2; NHP2; RPL29; MRPL27; MRPL9;
Liver cancer	5	7697	25	0.595181	0.965633	1	1	1	MRPL2; MRPS7; RPL11; MRPL27; MRPL9;
Dendritic cells	7	1954	35	3.28038	0.00345881	1	0.0946151	0.574285	MRPS7; RPS18; RPS3; RPL11; RPL6; RPS19; RPL29;
OVCAR3	13	3714	65	3.20308	1.77296e-05	0.0150347	0.00115652	0.0070197	MRPS2; MRPL15; MRPL16; MRPS7; RPS18; RPS3; RPL11; RPL6; RPL19; RPS19; NHP2; RPL29; MRPL9;
Huh7	4	2976	20	1.23209	0.413932	1	1	1	MRPS7; RPS3; NSA2; NHP2;
Serum	14	7685	70	1.66697	0.0106947	1	0.230652	1	MRPS11; MRPS2; MRPS7; RPS18; RPS3; RPL11; RPL26L1; RPL6; RPL19; RPS19; NHP2; RPP38; RPL29; MRPL27;
Lens	2	1037	10	1.77234	0.314589	1	1	1	RPS3; RPL11;
Breast	5	6413	25	0.714346	0.882831	1	1	1	MRPL2; MRPS7; RPL11; MRPL27; MRPL9;
Hair	6	817	30	6.72636	0.000175984	0.149234	0.00877849	0.0532828	RPS18; RPS3; RPL11; RPL6; RPS19; RPL29;
H520	2	843	10	2.1802	0.234593	1	1	1	RPS3; RPS19;
CPE_SCX_fractionated	7	2331	35	2.74984	0.00923842	1	0.206163	1	MRPS11; RPS3; RPL11; RPL6; NSA2; RPL29; MRPL9;
CRC	12	4247	60	2.58579	0.000450138	0.381717	0.0190858	0.115845	MRPS2; MRPL2; RPS18; RPS3; RPL11; RPL26L1; RPL6; RPL19; RPS19; NHP2; RPL29; MRPL9;
Preadipocytes	3	510	15	5.39661	0.0172454	1	0.340096	1	RPS3; RPL6; RPS19;
Fetal hepatocytes	4	3784	20	0.969003	0.617854	1	1	1	MRPS7; RPS3; NHP2; MRPL27;
Vulva/anal skin	5	6377	25	0.718379	0.879236	1	1	1	MRPL2; MRPS7; RPL11; MRPL27; MRPL9;
	3	1183	15	2.32654	0.135581	1	1	1	RPS18; RPL11; RPS19;
HH4	5	2684	25	1.70682	0.15887	1	1	1	MRPS11; MRPS7; RPS3; NHP2; MRPL27;
Ramos	4	1566	20	2.34144	0.0859232	1	1	1	RPS18; RPL11; RPS19; NHP2;
Leukocytes	5	2845	25	1.61023	0.189326	1	1	1	RPS3; RPL6; RPS19; NSA2; NHP2;
Renal cancer	4	7121	20	0.514915	0.979893	1	1	1	MRPL2; MRPS7; MRPL27; MRPL9;
Aorta	2	530	10	3.46773	0.113002	1	1	1	RPS3; RPS19;
hupo46_reference_cam	4	1042	20	3.51889	0.0243839	1	0.449511	1	MRPL2; MRPL15; RPL6; RPL29;
Vagina	4	5307	20	0.69092	0.874606	1	1	1	MRPL2; MRPS7; RPL11; MRPL9;
Monocytes	3	745	15	3.69434	0.0457519	1	0.762472	1	RPS3; RPL11; RPL6;
MDA-MB-468	5	770	25	5.94942	0.00119172	1	0.0404232	0.245357	RPS18; RPS3; RPL6; RPL19; RPS19;
HL60	2	545	10	3.37229	0.118354	1	1	1	RPS3; RPL11;
TOV21G	3	904	15	3.04457	0.0732753	1	1	1	RPS3; RPL19; RPS19;
Oral mucosa	5	5861	25	0.781625	0.818232	1	1	1	MRPL2; MRPS7; RPL11; MRPL27; MRPL9;
Esophagus	4	6034	20	0.607675	0.93567	1	1	1	MRPL2; MRPS7; RPL11; MRPL9;
NB4	3	711	15	3.87101	0.0407099	1	0.704531	1	RPS3; RPL11; RPL6;
031003_BALF2	1	1102	5	0.838048	0.711493	1	1	1	NHP2;
Tears	1	510	5	1.81082	0.432028	1	1	1	RPS3;
CaOV3	13	3355	65	3.54582	5.50435e-06	0.00466769	0.000424335	0.00257559	MRPS11; MRPL2; MRPL15; MRPL16; MRPS7; RPS18; RPS3; RPL11; RPL6; RPL19; RPS19; MRPL27; MRPL9;
Melanoma	7	1826	35	3.51033	0.00234302	1	0.0714943	0.433949	RPS18; RPS3; RPL11; RPL26L1; RPL6; RPL19; RPS19;
15_clinprot_c3	4	749	20	4.89542	0.00799215	1	0.18826	1	MRPS11; RPL6; RPS19; NHP2;
17_wcx	5	1438	25	3.18573	0.0170354	1	0.340096	1	MRPS11; MRPL15; RPS3; RPL11; NHP2;
hupo1_b2-edta_cam	2	316	10	5.81605	0.0460414	1	0.762472	1	RPS3; RPL11;
H23	1	896	5	1.03072	0.633854	1	1	1	RPS3;
YTS	7	1888	35	3.39505	0.00284105	1	0.0803071	0.48744	RPS18; RPS3; RPL11; RPL6; RPL19; RPS19; RPL29;
hupo1_b2-hep_cam	2	848	10	2.16735	0.236641	1	1	1	MRPS7; RPS3;
Embryonic stem cells	13	3047	65	3.90424	1.78792e-06	0.00151615	0.000168462	0.00102251	MRPL2; MRPL15; MRPL16; MRPS7; RPS18; RPS3; RPL11; RPL6; RPL19; RPS19; NSA2; RPL29; MRPL9;
Saliva	1	912	5	1.01264	0.640533	1	1	1	RPS3;
Nuclear	3	1319	15	2.08666	0.171215	1	1	1	RPS3; RPL11; NHP2;
MV4-11	4	382	20	9.59848	0.000695159	0.589495	0.0245623	0.149086	RPS18; RPS3; RPL6; RPL19;
HEK293	19	4439	95	3.91588	3.07737e-11	2.60961e-08	1.58176e-08	9.6008e-08	MRPS11; MRPS2; MRPL2; MRPL15; MRPL16; MRPS7; RPS18; RPS3; RPL11; RPL26L1; RPL6; RPL19; RPS19; NSA2; NHP2; RPP38; RPL29; MRPL27; MRPL9;
A549	6	997	30	5.51198	0.000516291	0.437814	0.0208483	0.126543	RPS18; RPS3; RPL11; RPL19; RPS19; RPL29;
Fetus	1	2992	5	0.308668	0.971934	1	1	1	MRPL15;
051503_BAL20_gly_hui	1	268	5	3.44591	0.255666	1	1	1	RPS3;
Adducin	3	486	15	5.6631	0.0151702	1	0.313763	1	MRPS7; RPS3; MRPL27;
MCF10A	1	661	5	1.39716	0.521111	1	1	1	RPS3;
041803_BALF3	4	1103	20	3.32428	0.0293286	1	0.529162	1	RPS3; RPL11; RPL6; RPL19;
Muscle	1	904	5	1.0216	0.637208	1	1	1	RPS19;
Endometrium	1	1202	5	0.768327	0.743276	1	1	1	RPL29;
Colorectal cancer cells	3	561	15	4.90602	0.0221665	1	0.417715	1	RPS18; RPS3; RPL6;
ARPE-19	4	330	20	11.1109	0.000400586	0.339697	0.0178788	0.108519	RPS18; RPL11; RPL6; RPS19;
DU145	2	941	10	1.95315	0.274949	1	1	1	RPS3; RPL11;
Lacrimal glands	1	453	5	2.03867	0.394475	1	1	1	RPS3;
Cervico-vaginal fluid	1	565	5	1.63455	0.466158	1	1	1	RPS3;
Aspc1	2	483	10	3.80516	0.0966994	1	1	1	RPS18; RPS3;
050603_BALF11	5	1019	25	4.49565	0.00407721	1	0.105707	0.641608	MRPS7; RPS18; RPS3; RPL11; RPL6;
Blood	1	227	5	4.06827	0.221052	1	1	1	RPS19;
Pituitary gland	1	494	5	1.86947	0.421716	1	1	1	RPS3;
B cells	4	533	20	6.87927	0.00237944	1	0.0714943	0.433949	RPS3; RPL11; RPL26L1; RPS19;
SH-SY5Y	4	537	20	6.82802	0.00244497	1	0.0714943	0.433949	RPS18; RPS3; RPS19; RPL29;
Adrenal cortex	1	82	5	11.2613	0.0859595	1	1	1	NSA2;
Panc1	1	346	5	2.66911	0.317523	1	1	1	RPS3;
01_glyco	2	667	10	2.75548	0.164073	1	1	1	MRPL16; RPS3;
Umbilical vein endothelial cells	1	178	5	5.18812	0.177677	1	1	1	RPL29;
WM1158	2	212	10	8.66907	0.0221341	1	0.417715	1	RPL11; RPL29;
Adrenal medulla	1	71	5	13.0057	0.0748504	1	1	1	NSA2;
Uterine epithelium	1	7	5	131.746	0.00762773	1	0.184809	1	RPL29;
Mammary epithelium	1	75	5	12.3122	0.0789048	1	1	1	RPL29;
Trophoblast	1	44	5	20.9847	0.0470361	1	0.762472	1	RPS18;
Uterine stromal cells	1	10	5	92.2615	0.0108798	1	0.230652	1	RPL29;

## Sheet: Transcription factor
Analysis: Transcription factor
Dataset name: 1
Number of genes in the dataset: 20
Number of genes in the dataset (which are available in Transcription factor database) :18
Number of genes in background: 15253
Is analysis quantitative: No
						Corrected p-values
Transcription factor	No. of genes in the dataset	No. of genes in the background dataset	Percentage of genes	Fold enrichment	P-value (Hypergeometric test)	Bonferroni method	BH method	Q-value (Storey-Tibshirani method)	genes mapped (from input data set)
NFIC	1	2040	5.55556	0.419306	0.924672	1	1	1	RPS19;
NR1H3	2	1020	11.1111	1.66891	0.341207	1	1	1	RPL19; MRPL36;
RXRA	2	1113	11.1111	1.52946	0.38212	1	1	1	RPL19; MRPL36;
ETS1	4	2496	22.2222	1.36063	0.338784	1	1	1	RPS3; RPL6; MRPL27; MRPL9;
EHF	1	753	5.55556	1.13596	0.598207	1	1	1	RPL19;
NFYA	1	2544	5.55556	0.336236	0.962612	1	1	1	NHP2;
RORA	1	1168	5.55556	0.732347	0.761841	1	1	1	RPL19;
YY1	1	1317	5.55556	0.649493	0.803357	1	1	1	MRPL36;
ELK1	8	1986	44.4444	3.4158	0.00105867	0.222322	0.222322	1	MRPL16; RPL11; RPL26L1; RPL6; RPL19; RPS19; NSA2; MRPL27;
GABPA	7	2702	38.8889	2.19722	0.0281332	1	1	1	RPS3; RPL26L1; RPL6; RPL19; RPS19; NSA2; MRPL27;
CTCF	1	2605	5.55556	0.328363	0.965715	1	1	1	MRPS2;
HERPUD1	1	421	5.55556	2.03175	0.395945	1	1	1	MRPS2;
KLF7	3	4448	16.6667	0.573116	0.930832	1	1	1	MRPL2; MRPL15; NHP2;
MAF	1	466	5.55556	1.83556	0.428115	1	1	1	MRPS7;
NR5A1	1	1129	5.55556	0.757644	0.74968	1	1	1	MRPL2;
RFX1	1	2158	5.55556	0.396378	0.935911	1	1	1	MRPS2;
SF1	1	1129	5.55556	0.757644	0.74968	1	1	1	MRPL2;
SP1	5	7140	27.7778	0.594266	0.970729	1	1	1	MRPL2; MRPL15; MRPS7; NHP2; MRPL36;
SP4	3	4345	16.6667	0.586702	0.922464	1	1	1	MRPL2; MRPS7; NHP2;
TCF3	1	2140	5.55556	0.399712	0.934305	1	1	1	RPL26L1;
E2F1	1	1188	5.55556	0.720018	0.767859	1	1	1	MRPL36;
EGR1	1	3215	5.55556	0.266061	0.985926	1	1	1	MRPL2;
NRF1	4	2037	22.2222	1.66722	0.212293	1	1	1	RPL26L1; RPL19; RPP38; MRPL36;
NR4A2	1	1042	5.55556	0.820902	0.720405	1	1	1	MRPL2;
PPARA	2	370	11.1111	4.60071	0.0695466	1	1	1	RPL19; MRPL36;
PPARG	4	2016	22.2222	1.68459	0.206919	1	1	1	MRPL2; RPL19; RPS19; MRPL36;
HSF1	2	806	11.1111	2.11202	0.245669	1	1	1	MRPL2; RPL19;
ETV7	4	1049	22.2222	3.23748	0.0313301	1	1	1	RPL26L1; RPS19; NSA2; MRPL27;
TEAD1	1	422	5.55556	2.02694	0.396678	1	1	1	MRPL2;
ARNT	2	403	11.1111	4.22398	0.0806715	1	1	1	MRPL15; MRPL36;
HNF4A	3	3015	16.6667	0.845512	0.720692	1	1	1	MRPL2; RPL19; MRPL36;
HOXA3	1	573	5.55556	1.4928	0.498231	1	1	1	NSA2;
CUX1	1	350	5.55556	2.4439	0.341692	1	1	1	MRPL9;
MYC	5	1086	27.7778	3.90702	0.00710562	1	0.74609	1	MRPL15; RPL11; RPS19; MRPL36; MRPL27;
ELF2	1	780	5.55556	1.09664	0.61147	1	1	1	RPS3;
FOS	1	1754	5.55556	0.487676	0.889218	1	1	1	MRPL2;
FOSB	1	1754	5.55556	0.487676	0.889218	1	1	1	MRPL2;
JUN	1	1754	5.55556	0.487676	0.889218	1	1	1	MRPL2;
JUNB	1	1754	5.55556	0.487676	0.889218	1	1	1	MRPL2;
JUND	1	1754	5.55556	0.487676	0.889218	1	1	1	MRPL2;
NR6A1	1	769	5.55556	1.11232	0.606117	1	1	1	MRPL2;
RAB40B	2	806	11.1111	2.11202	0.245669	1	1	1	MRPL2; RPL19;
RARA	2	806	11.1111	2.11202	0.245669	1	1	1	MRPL2; RPL19;
REST	1	765	5.55556	1.11814	0.604154	1	1	1	MRPS2;
INSM1	1	487	5.55556	1.75641	0.442567	1	1	1	RPS19;
BACH2	1	628	5.55556	1.36206	0.531031	1	1	1	MRPL2;
EBF1	1	205	5.55556	4.17242	0.216275	1	1	1	MRPL2;
ZNF143	2	618	11.1111	2.7545	0.163927	1	1	1	MRPS11; RPL6;
STRA13	2	574	11.1111	2.96564	0.145694	1	1	1	MRPS2; MRPL27;
TP53	1	23	5.55556	37.1746	0.0268119	1	1	1	RPS19;

## Sheet: Clinical phenotype
Analysis: Clinical phenotype
Dataset name: 1
Number of genes in the dataset: 20
Number of genes in the dataset (which are available in Clinical phenotype database) :1
Number of genes in background: 1820
Is analysis quantitative: No
						Corrected p-values
Clinical phenotype	No. of genes in the dataset	No. of genes in the background dataset	Percentage of genes	Fold enrichment	P-value (Hypergeometric test)	Bonferroni method	BH method	Q-value (Storey-Tibshirani method)	genes mapped (from input data set)
Absent radial pulse	1	1	100	1801.99	0.000549451	1	0.759066	1	RPS19;
Absent thumbs	1	3	100	604.654	0.00164835	1	1	1	RPS19;
Age at diagnosis 2-4 months	1	1	100	1801.99	0.000549451	1	0.759066	1	RPS19;
Anemia, congenital hypoplastic, moderate-severe (normochromic, macrocytic)	1	1	100	1801.99	0.000549451	1	0.759066	1	RPS19;
Atrial septal defect	1	47	100	38.7154	0.0258242	1	1	1	RPS19;
Autosomal dominant	1	747	100	2.43639	0.41044	1	1	1	RPS19;
Bifid thoracic vertebrae	1	1	100	1801.99	0.000549451	1	0.759066	1	RPS19;
Bifid thumbs	1	1	100	1801.99	0.000549451	1	0.759066	1	RPS19;
Cardiovascular	1	446	100	4.08065	0.245055	1	1	1	RPS19;
Central Nervous System	1	887	100	2.05185	0.487363	1	1	1	RPS19;
Chest	1	243	100	7.48944	0.133516	1	1	1	RPS19;
Clavicle agenesis	1	1	100	1801.99	0.000549451	1	0.759066	1	RPS19;
Cleft lip	1	43	100	42.316	0.0236264	1	1	1	RPS19;
Cleft palate	1	97	100	18.7611	0.0532967	1	1	1	RPS19;
Coarctation of the aorta	1	1	100	1801.99	0.000549451	1	0.759066	1	RPS19;
Colon cancer	1	4	100	453.868	0.0021978	1	1	1	RPS19;
Delayed closure of fontanel	1	4	100	453.868	0.0021978	1	1	1	RPS19;
Delivery	1	43	100	42.316	0.0236264	1	1	1	RPS19;
Downslanting palpebral fissures	1	57	100	31.9244	0.0313187	1	1	1	RPS19;
Elevated erythrocyte adenosine deaminase (eADA)	1	1	100	1801.99	0.000549451	1	0.759066	1	RPS19;
Elevated fetal hemoglobin (HbF)	1	1	100	1801.99	0.000549451	1	0.759066	1	RPS19;
External Features	1	180	100	10.1106	0.0989011	1	1	1	RPS19;
Eyes	1	826	100	2.20338	0.453846	1	1	1	RPS19;
Face	1	433	100	4.20316	0.237912	1	1	1	RPS19;
Failure to thrive	1	202	100	9.0095	0.110989	1	1	1	RPS19;
Flat nose	1	8	100	227.217	0.0043956	1	1	1	RPS19;
Growth	1	609	100	2.98847	0.334615	1	1	1	RPS19;
Hands	1	349	100	5.21478	0.191758	1	1	1	RPS19;
Head	1	345	100	5.27524	0.18956	1	1	1	RPS19;
Head and Neck	1	954	100	1.90775	0.524176	1	1	1	RPS19;
Heart	1	351	100	5.18507	0.192857	1	1	1	RPS19;
Height	1	290	100	6.27568	0.159341	1	1	1	RPS19;
Hematology	1	229	100	7.94729	0.125824	1	1	1	RPS19;
High-arched palate	1	86	100	21.1604	0.0472527	1	1	1	RPS19;
Hypertelorism	1	121	100	15.0402	0.0664835	1	1	1	RPS19;
Hypoplastic coccygeal vertebrae	1	1	100	1801.99	0.000549451	1	0.759066	1	RPS19;
Hypoplastic ilia	1	4	100	453.868	0.0021978	1	1	1	RPS19;
Hypoplastic sacral vertebrae	1	1	100	1801.99	0.000549451	1	0.759066	1	RPS19;
Hypoplastic thumbs	1	5	100	363.275	0.00274725	1	1	1	RPS19;
Intrauterine growth retardation, mild	1	1	100	1801.99	0.000549451	1	0.759066	1	RPS19;
Laboratory Abnormalities	1	712	100	2.55616	0.391209	1	1	1	RPS19;
Limbs	1	339	100	5.3686	0.186264	1	1	1	RPS19;
Mental retardation (in some patients)	1	12	100	151.541	0.00659341	1	1	1	RPS19;
Microcephaly	1	129	100	14.1075	0.0708791	1	1	1	RPS19;
Micrognathia	1	121	100	15.0402	0.0664835	1	1	1	RPS19;
Mild radial hypoplasia	1	1	100	1801.99	0.000549451	1	0.759066	1	RPS19;
Miscellaneous	1	1228	100	1.48208	0.674725	1	1	1	RPS19;
Most cases are sporadic	1	10	100	181.819	0.00549451	1	1	1	RPS19;
Mouth	1	417	100	4.36443	0.229121	1	1	1	RPS19;
Myelodysplastic syndrome	1	2	100	905.478	0.0010989	1	1	1	RPS19;
Narrow shoulders	1	6	100	302.83	0.0032967	1	1	1	RPS19;
Neck	1	130	100	13.999	0.0714286	1	1	1	RPS19;
Neoplasia	1	151	100	12.0522	0.082967	1	1	1	RPS19;
Neurologic	1	930	100	1.95698	0.510989	1	1	1	RPS19;
Neutropenia, mild	1	1	100	1801.99	0.000549451	1	0.759066	1	RPS19;
Nose	1	314	100	5.79603	0.172527	1	1	1	RPS19;
Onset in infancy	1	82	100	22.1925	0.0450549	1	1	1	RPS19;
Osteogenic sarcoma	1	5	100	363.275	0.00274725	1	1	1	RPS19;
Other	1	384	100	4.73949	0.210989	1	1	1	RPS19;
Pallor	1	2	100	905.478	0.0010989	1	1	1	RPS19;
Parietal foramina	1	4	100	453.868	0.0021978	1	1	1	RPS19;
Pelvis	1	153	100	11.8947	0.0840659	1	1	1	RPS19;
Premature birth	1	12	100	151.541	0.00659341	1	1	1	RPS19;
Prenatal Manifestations	1	115	100	15.8248	0.0631868	1	1	1	RPS19;
Presence of i erythrocyte antigen	1	1	100	1801.99	0.000549451	1	0.759066	1	RPS19;
Reticulocytopenia	1	2	100	905.478	0.0010989	1	1	1	RPS19;
Retrognathia	1	25	100	72.7713	0.0137363	1	1	1	RPS19;
Ribs, Sternum, Clavicles and Scapulae	1	162	100	11.2339	0.089011	1	1	1	RPS19;
Short neck	1	63	100	28.8845	0.0346154	1	1	1	RPS19;
Short stature	1	172	100	10.5808	0.0945055	1	1	1	RPS19;
Skeletal	1	634	100	2.87063	0.348352	1	1	1	RPS19;
Skin	1	539	100	3.37658	0.296154	1	1	1	RPS19;
Skin, Nails, Hair	1	554	100	3.28516	0.304396	1	1	1	RPS19;
Skull	1	148	100	12.2965	0.0813187	1	1	1	RPS19;
Spine	1	286	100	6.36345	0.157143	1	1	1	RPS19;
Strabismus	1	128	100	14.2177	0.0703297	1	1	1	RPS19;
Thrombocytopenia	1	52	100	34.9935	0.0285714	1	1	1	RPS19;
Thrombocytosis	1	6	100	302.83	0.0032967	1	1	1	RPS19;
Triphalangeal thumbs	1	3	100	604.654	0.00164835	1	1	1	RPS19;
Variable expressivity in families	1	1	100	1801.99	0.000549451	1	0.759066	1	RPS19;
Vascular	1	215	100	8.46477	0.118132	1	1	1	RPS19;
Ventricular septal defect	1	52	100	34.9935	0.0285714	1	1	1	RPS19;
Webbed neck	1	12	100	151.541	0.00659341	1	1	1	RPS19;

## Sheet: COSMIC
Analysis: COSMIC
Dataset name: 1
Number of genes in the dataset: 20
Number of genes in the dataset (which are available in COSMIC database) :20
Number of genes in background: 18585
Is analysis quantitative: No
						Corrected p-values
COSMIC	No. of genes in the dataset	No. of genes in the background dataset	Percentage of genes	Fold enrichment	P-value (Hypergeometric test)	Bonferroni method	BH method	Q-value (Storey-Tibshirani method)	genes mapped (from input data set)
skin	5	11549	25	0.402911	0.999852	1	1	1	MRPS2; MRPL15; RPS3; RPS19; RPP38;
prostate	9	9587	45	0.872886	0.791851	1	1	1	MRPS2; MRPL2; MRPL15; MRPL16; RPS18; RPL11; RPL19; NSA2; MRPL27;
biliary tract	1	1799	5	0.521439	0.869618	1	1	1	RPL11;
lung	9	15353	45	0.545063	0.999976	1	1	1	MRPS2; MRPL2; MRPL15; RPS18; RPL6; RPL19; RPS19; RPP38; MRPL36;
meninges	1	447	5	2.09855	0.385634	1	1	1	RPL19;
kidney	12	13456	60	0.828977	0.927779	1	1	1	MRPL2; MRPL15; MRPL16; RPS18; RPS3; RPL11; RPL26L1; RPL19; NSA2; NHP2; MRPL36; MRPL9;
endometrium	9	12807	45	0.65342	0.992959	1	1	1	MRPL2; MRPL15; MRPL16; RPL26L1; RPS19; NSA2; NHP2; RPP38; MRPL27;
stomach	2	1289	10	1.44829	0.408566	1	1	1	MRPL16; RPS19;
large intestine	16	17427	80	0.853265	0.993428	1	1	1	MRPS11; MRPS2; MRPL2; MRPL15; MRPS7; RPS18; RPS3; RPL11; RPL26L1; RPL6; RPL19; NSA2; NHP2; RPP38; MRPL27; MRPL9;
central nervous system	5	12014	25	0.387316	0.999943	1	1	1	MRPL16; MRPS7; RPL11; RPL6; NHP2;
ovary	6	12007	30	0.464895	0.999645	1	1	1	MRPL15; RPS3; NSA2; NHP2; RPP38; MRPL9;
240 NB cases mutantgeneList	1	3941	5	0.238029	0.991513	1	1	1	RPP38;
haematopoietic and lymphoid tissue	5	8977	25	0.518348	0.99109	1	1	1	MRPS11; RPL29; MRPL36; MRPL27; MRPL9;
breast	12	14924	60	0.747435	0.991016	1	1	1	MRPS11; MRPS2; MRPL2; MRPL15; MRPL16; MRPS7; RPS18; RPL26L1; RPL19; NSA2; RPP38; MRPL36;
upper aerodigestive tract	2	6364	10	0.293347	0.997402	1	1	1	MRPL15; RPL6;
cervix	1	2590	5	0.362189	0.950373	1	1	1	RPL6;
thyroid	3	8760	15	0.319137	0.999509	1	1	1	MRPL16; RPL19; RPS19;
liver	12	14176	60	0.786873	0.970261	1	1	1	MRPS11; MRPS2; MRPL2; MRPL15; MRPS7; RPL11; RPL6; RPL19; NHP2; RPP38; RPL29; MRPL9;
pancreas	5	12286	25	0.378741	0.999969	1	1	1	MRPS11; MRPS2; RPS18; RPS3; RPL11;
oesophagus	2	5660	10	0.329833	0.993187	1	1	1	RPL6; MRPL27;
urinary tract	8	13085	40	0.568557	0.998896	1	1	1	MRPS2; MRPL16; MRPS7; RPS18; RPL11; RPL26L1; RPL6; MRPL27;
